# Supplementary material for: Smyd1 Facilitates Heart Development by Antagonizing Oxidative and ER Stress Responses
Source: PubMed Central journal article supplement (PMC4372598; doi:10.1371/journal.pone.0121765), 2015-03-24
Supplement: pone.0121765.s004.pdf [file pone.0121765.s004.pdf]

# Rasmussen et al.

Supplementary Table S1

| ECM and Structure           | mut1 vs wt1 | mut2 vs wt2 |
|-----------------------------|-------------|-------------|
| <b>Down regulated genes</b> |             |             |
| Rein                        | 0.64        | 0.25        |
| Tppp3                       | 0.36        | 0.38        |
| Mfap4                       | 0.5         | 0.38        |

| Skeletal Muscle             | mut1 vs wt1 | mut2 vs wt2 |
|-----------------------------|-------------|-------------|
| <b>Up regulated genes</b>   |             |             |
| Tcf15                       | 2.48        | 2.46        |
| Mib2                        | 1.89        | 2.12        |
| <b>Down regulated genes</b> |             |             |
| Phox2b                      | 0.313       | 0.605       |
| Barx1                       | 0.515       | 0.247       |

| Proliferation, ER Stress, and Autophagy | mut1 vs wt1 | mut2 vs wt2 |
|-----------------------------------------|-------------|-------------|
| <b>Up regulated genes</b>               |             |             |
| Chac1                                   | 15.6        | 16.2        |
| Trib3                                   | 5.42        | 4.82        |
| Ndrp1                                   | 4.94        | 4.16        |
| Lims2                                   | 5.33        | 4.09        |
| Atf5                                    | 2.35        | 3.12        |
| Jundm2                                  | 3.05        | 2.85        |
| Igfbp2                                  | 2.88        | 2.39        |
| Bnip3                                   | 1.85        | 2.83        |
| Otub2                                   | 2.47        | 3.02        |
| Eif4ebp1                                | 2.47        | 2.44        |
| Stag3                                   | 2.06        | 1.66        |
| Nfil3                                   | 2.07        | 1.47        |
| Jmjd6                                   | 1.62        | 1.66        |
| Atraid                                  | 1.54        | 2           |
| Dab2                                    | 1.52        | 2.07        |
| Ccnl2                                   | 1.47        | 3.11        |
| <b>Down regulated genes</b>             |             |             |
| Pik3r3                                  | 0.33        | 0.37        |
| Afp                                     | 0.2         | 0.04        |
| Idh1                                    | 0.47        | 0.23        |
| Ubtf                                    | 0.58        | 0.42        |
| Ccar1                                   | 0.69        | 0.4         |
| Mtvr2                                   | 0.57        | 0.43        |

| Angiogenesis and Hematopoiesis | mut1 vs wt1 | mut2 vs wt2 |
|--------------------------------|-------------|-------------|
| <b>Up regulated genes</b>      |             |             |
| Adm                            | 4.96        | 7.19        |
| Alas                           | 1.6         | 1.6         |
| Egln1                          | 3.86        | 3.8         |
| Egln3                          | 6.75        | 5.9         |
| Plek                           | 3.53        | 3.39        |
| Vegfa                          | 4.01        | 6.28        |
| Egr1                           | 1.91        | 2.42        |
| Cxcl4                          | 8.63        | 3.64        |
| Efna1                          | 1.45        | 1.87        |
| <b>Down regulated genes</b>    |             |             |
| Vtn                            | 0.25        | 0.21        |

| Cardiogenesis               | mut1 vs wt1 | mut2 vs wt2 |
|-----------------------------|-------------|-------------|
| <b>Up regulated genes</b>   |             |             |
| Acta1                       | 3.08        | 6.08        |
| Muc2                        | 3.61        | 6.61        |
| Hspa1b                      | 4.14        | 3.13        |
| Pdk1                        | 3.74        | 2.32        |
| Dkk3                        | 2.37        | 2.73        |
| Zic3                        | 2.36        | 2.27        |
| Nkx2.3                      | 1.45        | 1.42        |
| Obecn                       | 2.42        | 2.03        |
| Ftcd                        | 1.88        | 2.26        |
| Leprel1                     | 2.26        | 1.93        |
| Myh10                       | 1.55        | 2.91        |
| Tpm2                        | 1.54        | 1.65        |
| Lrrc10                      | 2.19        | 1.67        |
| Fos                         | 2.01        | 2.73        |
| Krt8                        | 2.43        | 1.58        |
| Wnt6                        | 2.02        | 1.55        |
| Mbnl2                       | 1.51        | 2.54        |
| Pax8                        | 1.43        | 2.32        |
| Snail3                      | 2.54        | 1.8         |
| Arsa                        | 2.03        | 1.82        |
| Bag2                        | 1.48        | 1.84        |
| Tcf25                       | 1.45        | 1.86        |
| Atp2a2                      | 1.6         | 2.07        |
| Pgk1                        | 1.85        | 2.57        |
| <b>Down regulated genes</b> |             |             |
| Msc                         | 0.24        | 0.45        |
| Ttr                         | 0.52        | 0.16        |
| Nkx6.1                      | 0.44        | 0.56        |
| Shox2                       | 0.43        | 0.49        |
| Mylk                        | 0.71        | 0.65        |
| Gata5                       | 0.71        | 0.67        |
| Tbx5                        | 0.65        | 0.97        |
| Foxfa1                      | 0.6         | 0.32        |
